# Supplementary material for: Automated bow shock and magnetopause boundary detection with Cassini using threshold and deep learning methods
Source: Frontiers journal article supplement (doi:10.3389/fspas.2022.1016453), 2022-10-20
Supplement: Table_1.xlsx [file Table_1.xlsx]

## Sheet: Sheet1
CV (10-fold)	Accuracy_train	Accuracy_val	AUC_train	AUC_val	Error_train	Error_val	Variance
1	0.89	0.9	0.91	0.92	0.45	0.55	0.1
2	0.96	0.92	0.99	0.96	0.12	0.29	0.17
3	0.96	0.95	0.99	0.97	0.11	0.23	0.12
4	0.96	0.94	0.99	0.96	0.12	0.21	0.09
5	0.95	0.96	0.98	0.97	0.15	0.18	0.03
6	0.95	0.91	0.98	0.95	0.14	0.27	0.13
7	0.95	0.9	0.97	0.96	0.15	0.29	0.14
8	0.96	0.96	0.99	0.98	0.11	0.2	0.09
9	0.93	0.95	0.97	0.98	0.21	0.26	0.05
10	0.93	0.92	0.98	0.97	0.21	0.29	0.08
	0.944	0.931	0.975	0.962	0.177	0.277	0.1	Mean
	0.0210713	0.022561	0.0229129	0.0166132	0.0974731	0.0986965	0.0397492	Stddev
